# Supplementary material for: An electrochemical immunosensor based on a nano-ceria integrated microfluidic chip for interleukin-8 biomarker detection
Source: Royal Society of Chemistry journal article supplement (doi:10.1039/d4na00636d), 2024-11-14
Supplement: d4na00636d1.pdf [file d4na00636d1.pdf]

## Supplementary File

### An electrochemical immunosensor based on Nano-ceria integrated microfluidic chip for Interleukin-8 biomarker detection

Hema Bhardwaj, Zimad Hashmi, Avinash Kumar Singh, Gautam Kumar, G.B.V.S. Lakshmi, Pratima R. Solanki\*

Nano-Bio Laboratory, Special Centre for Nano Science (SCNS), Jawaharlal Nehru University, New Delhi-110067, India

Corresponding Author: [partima@mail.jnu.ac.in](mailto:partima@mail.jnu.ac.in), [pratimarsolanki@gmail.com](mailto:pratimarsolanki@gmail.com)

#### Figures:

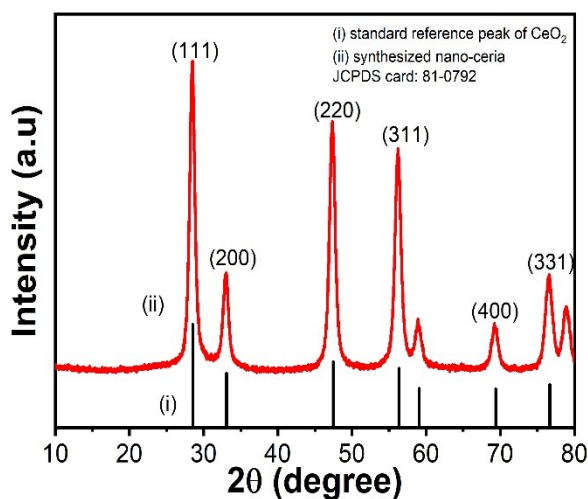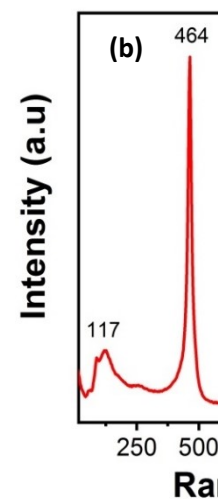

**Figure S1:** (a) XRD pattern of (i) standard reference peak plot of  $\text{CeO}_2$ , (ii) synthesized nano-ceria, (b) Raman spectrum of nano-ceria

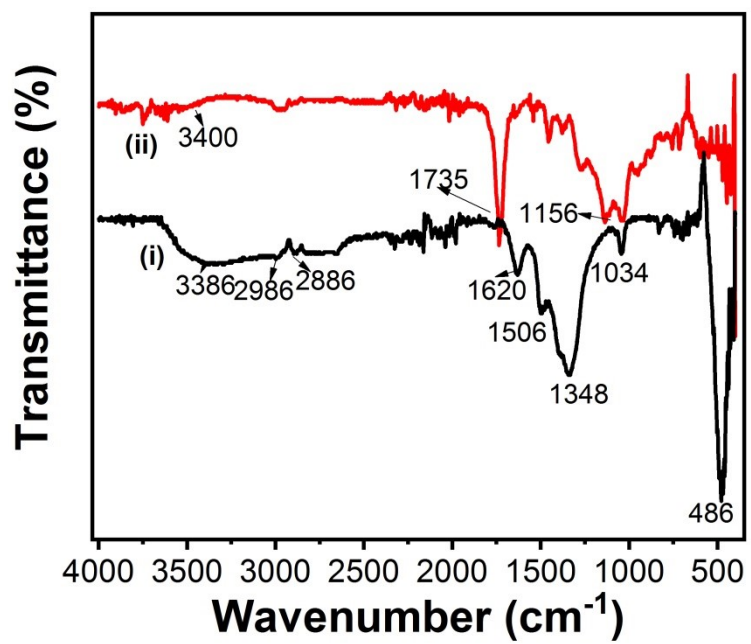

**Figure S2:** FT-IR spectrum of (i) nano-ceria, and (ii) anti-IL8/nano-ceria

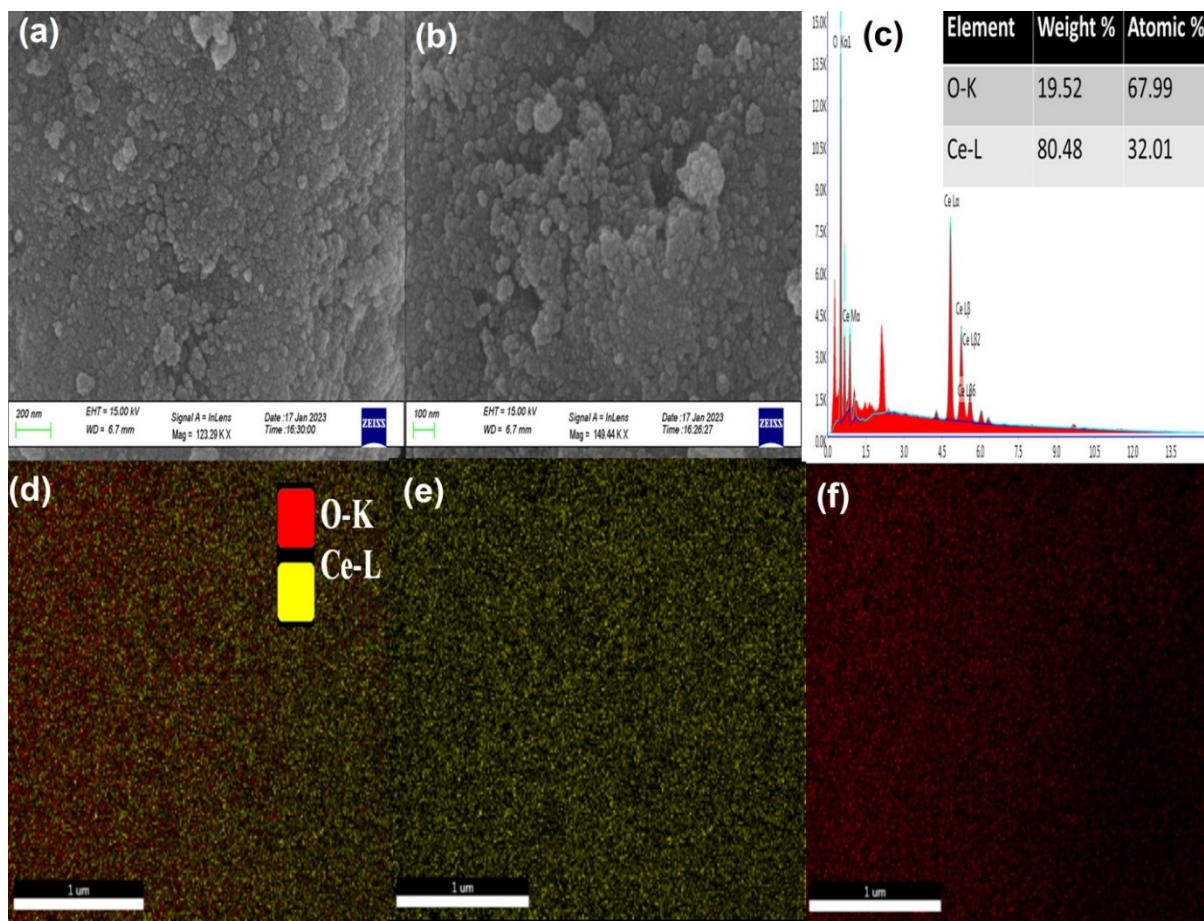

**Figure S3:** (a,b) Field Emission Scanning Electron Microscope (FESEM) images of synthesized nano-ceria at high and low magnification, (c) shows Energy Dispersive X-ray Spectroscopy (EDX) image representing the presence of elemental composition in nano-ceria, (d) elemental mapping of nano-ceria shows the presence of oxygen and cerium element, (e,f) elemental mapping of individual element cerium (e) and oxygen (f) element

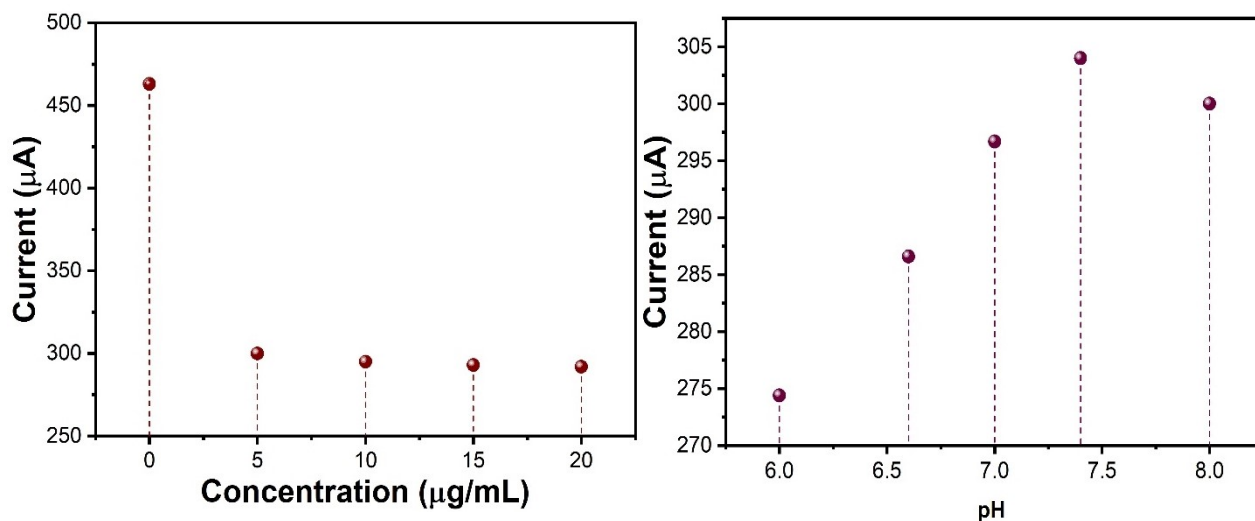

**Figure S4:** CV response of anti-IL8/nano-ceria/ITO immunoelectrode with various concentration antibodies of IL8 from 0 to 20  $\mu\text{g/mL}$ , (b) CV response of BSA/anti-IL8/nano-ceria/ITO immunoelectrode with various pH (6.0 to 8.0) of 0.2M PBS containing redox couple  $[\text{Fe}(\text{CN})_6]^{3-/4-}$

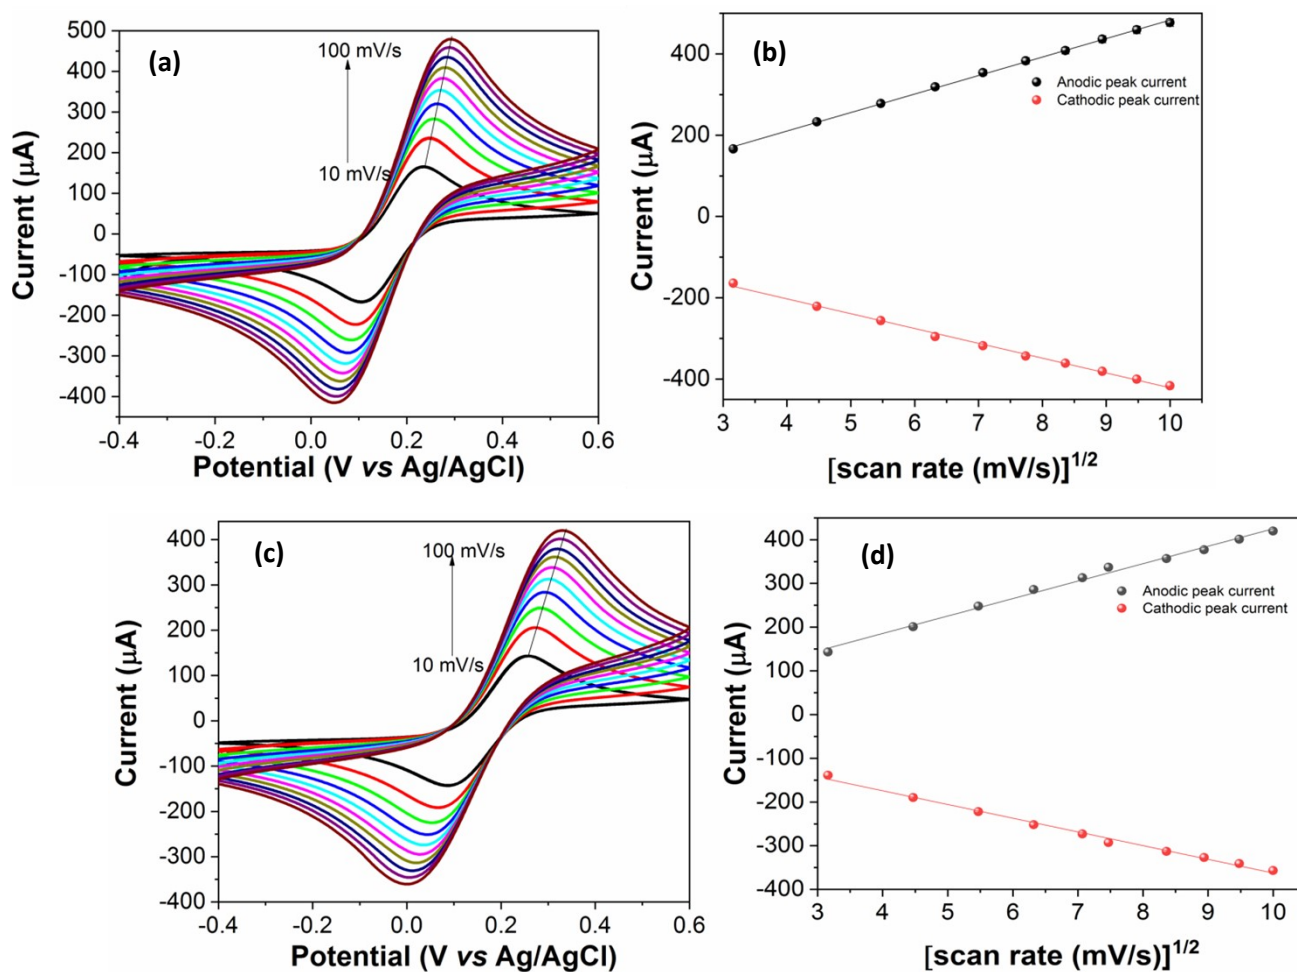

**Figure S5:** (a) CV studies of nano-ceria/ITO electrode as a function of scan rate range from 10-100  $\text{mV s}^{-1}$  (b) represents the linear calibration curve of anodic and cathodic current vs. square root of the scan rate of nano-ceria/ITO electrode, (c) illustrates CV studies of BSA/anti-IL8/nano-ceria/ITO electrodes as a function of scan rate from 10-100  $\text{mV s}^{-1}$ , (d) represents linear calibration curve of current vs. square root of the scan rate of BSA/anti-IL8/nano-ceria/ITO electrodes.
